# Supplementary material for: Arbuscular Mycorrhizal Fungi Associated with Myrciaria dubia in the Amazonia Region, Peru
Source: Hindawi journal article supplement (doi:10.1155/2024/9977517), 2024-01-01
Supplement: f1 [file 9977517.f1.docx]

**Supplementary Table S1.** Physical-chemical soil properties of the National Germplasm Bank of *M. dubia* (Kunth) McVaugh at the Agrarian Experimental Station "San Roque" in Loreto Region, National Institute of Agrarian Innovation (INIA).

|  |  |
| --- | --- |
| **Soil properties** | |
| **pH** | 4.1 |
| **EC (dS/m)** | 0.13 |
| **OM (%)** | 1.63 |
| **P (ppm)** | 3.01 |
| **K (ppm)** | 58 |
| **Texture** |  |
| **Sand (%)** | 46.112 |
| **Silt (%)** | 47.01 |
| **Clay (%)** | 6.88 |
| **CEC** | 9.6 |
| **Changeable cations** |  |
| **Ca+2** | 4.4 |
| **Mg+2** | 0.58 |
| **K+2** | 0.1 |
| **Na+** | 0.08 |
| **Al+3+H+** | 4.44 |

Electrical conductivity (EC), organic matter (OM), phosphorus (P), potassium (K), cation exchange capacity (CEC), calcium cation (Ca+2), magnesium cation (Mg+2), potassium cation (K+), sodium cation (Na+), aluminum cation (Al+3+H+).
