# Supplementary material for: Arbuscular Mycorrhizal Fungi Associated with Myrciaria dubia in the Amazonia Region, Peru
Source: Hindawi journal article supplement (doi:10.1155/2024/9977517), 2024-01-01
Supplement: f2 [file 9977517.f2.docx]

**Supplementary Table S2.** Abundance, richness of species and colonization of arbuscular mycorrhizal fungi in the rhizospheric soil of two elite accessions from the National GermplasmBank of *M. dubia* (Kunth) Mc Vaug of the Agrarian Experimental Station "San Roque" Iquitos, of the National Institute of Agrarian Innovation (INIA).

|  |  |  |
| --- | --- | --- |
| **Species AMF** | **Accessions** | |
| **Samito** | **Yuto** |
| **Diversisporales** |  |  |
| ***Acaulosporaceae*** |  |  |
| *Acaulospora mellea* | 90 | 65 |
| *Acaulospora morrowiae* | 7 | 4 |
| *Acaulospora undulata* | - | 5 |
| *Acaulospora* sp. 1 | 3 | - |
| *Acaulospora* sp. 2 | - | 4 |
| ***Diversisporaceae*** |  |  |
| *Diversispora aurantia* | 2 | 2 |
| *Diversispora eburnea* | 35 | 2 |
| *Diversispora invermanium* | 4 | 1 |
| *Diversispora tortuosa* | - | 4 |
| **Archaeosporales** |  |  |
| ***Ambisporaceae*** |  |  |
| *Ambispora appendicula* | 4 | - |
| *Ambispora reticulata* | 2 | 7 |
| *Ambispora* sp. | 8 | 13 |
| **Glomerales** |  |  |
| ***Glomeraceae*** |  |  |
| *Funneliformis geosporus* | 4 | 2 |
| *Glomus macrocarpum* | 2 | 33 |
| *Sclerocystis sinuosum* | - | 4 |
| **Entrophosporales** |  |  |
| ***Entrophosporaceae*** |  |  |
| *Entrophospora etunicata* | - | 3 |
| **Gigasporales** |  |  |
| ***Gigasporaceae*** |  |  |
| *Gigaspora margarita* | - | 5 |
| **Paraglomerales** |  |  |
| ***Paraglomeraceae*** |  |  |
| *Paraglomus* sp. | 21 | 2 |
| **Number of espores /50 g soil** | 182 | 156 |
| **Colonization (%)** | **94** | **88** |
